# Supplementary material for: Identification of a 3rd Na+ Binding Site of the Glycine Transporter, GlyT2
Source: PubMed Central journal article supplement (PMC4919009; doi:10.1371/journal.pone.0157583), 2016-06-23
Supplement: pone.0157583.s001.pdf [file pone.0157583.s001.pdf]

## Supporting Information

# Identification of a 3<sup>rd</sup> Na<sup>+</sup> binding site of the glycine transporter, GlyT2

Nandhitha Subramanian<sup>1</sup>, Amanda J. Scopelitti<sup>2,3</sup>, Jane E. Carland<sup>2</sup>, Renae M. Ryan<sup>2</sup>, Megan L. O'Mara<sup>1#</sup> and Robert J. Vandenberg<sup>2#</sup>

<sup>1</sup> Research School of Chemistry, The Australian National University, Canberra, ACT, 2601, Australia

<sup>2</sup> Discipline of Pharmacology, School of Medical Sciences, University of Sydney, Sydney, NSW, 2006, Australia

<sup>3</sup> Department of Physiology and Biophysics, Weill Cornell Medical College, New York, NY 10021, USA

<sup>#</sup>To whom correspondence should be addressed:

Megan L. O'Mara, Research School of Chemistry, The Australian National University, Canberra, ACT, 2601, Australia, Email: [megan.o'mara@anu.edu.au](mailto:megan.o'mara@anu.edu.au)

Robert J. Vandenberg, Discipline of Pharmacology, Bosch Institute, School of Medical Sciences, University of Sydney, Sydney, NSW, 2006, Australia, Email: [robert.vandenberg@sydney.edu.au](mailto:robert.vandenberg@sydney.edu.au)

dDAT -----NS---ISDERE  
hNET MLLARMNPQVQOPENNGADTGPEQPLRARKTAELLVVKERNGVQCLLAPRDG---DAQPRE  
LeuT -----RE  
GlyT2 -----SVATVATQEQDENKARG  
GlyT1 -----AVPSEATKRDQ----NLKRG  
BetP -----LENPTNLEGKLA----DAEEIILEGE---DTQASL

dDAT TWS---GKVDFLLSVIGFAVDLANVW-RFPYLCY----KNGGGAFLV--PYGIMLAVGGI  
hNET TWG---KKIDFLLSVVGFVAVDLANVW-RFPYLCY----KNGGGAFLI--PYTLFLIIAGM  
LeuT HWA---TRLGLILAMAGNAVGLGNFL-RFPVQAA----ENGGGAFMI--PYIIAFLLVGI  
GlyT2 NWS---SKLDFILSMVGYAVGLGNVW-RFPYLAF----QNGGGAFLI--PYLMMMLALAGL  
GlyT1 NWG---NQIEFVLTSVGYAVGLGNVW-RFPYLCY----RNGGGAFMF--PYFIMLIFCGI  
BetP NWSVIVPALVIVLATVWVGIGFKDSFTNFASSALSAVVDNLGWAFILFGTVFVFFIVVIA

dDAT PLFYMELALGQHNRKGAIT-----CWGRLVPLFKGIGYAVVL-----  
hNET PLFYMELALGQYNREGAAT-----VW-KICPFFKGVGYAVIL-----  
LeuT PLMWIEWAMGRYGGAQGHGTTPAIFYLLW--RNRFKILGVFGLW-----  
GlyT2 PIFFLEVSLGQFASQGPVS-----VW-KAIPALQCGCIAMLI-----  
GlyT1 PLFFMELSFQFASQGCLG-----VW-RISPMFKGVGYGMMV-----  
BetP ASKFGTIRLGRIDEAPEFR---TV---SW-ISMMFAAGMGIDLMEFYGTTEPLTFYRNGVP

dDAT -----IAFYVDFYYNVIIAWSLRFFFASFTNSLPWTSCNNIWNTPNCR-----  
hNET -----IALYVGFYYNVIIAWSLYLFSSFTLNLPWTDGHTWNSPNCNTPDK--LLNG  
LeuT -----IPLVVAIYYVYIESWTLGFAIKFLVGLVP-----EPPTDPDS-----IL--  
GlyT2 -----ISVLIAYYNVYIICYTLFYLFASFVSVLPWGSCNNPWNTPECKDKTKLLDLS  
GlyT1 -----VSTYIGIYYNVVICIAFYFFSSMTHVLPWAYCNPWNTHDCAG----VLDA  
BetP GHDEHNVGVAMSTTMFHWTLHPWAIYAIVGLAIAYSTFRVGRKQLLSSAFVP----LIGE

dDAT -----P-----FESQGF--QSAASEYFNRYILELNRSEGI  
hNET SVLGNHTK-----YSKYKF---TPAAEFYERGVLHLHESSEGI  
LeuT -----RPFKEFLYSYI-----GV  
GlyT2 CVISDHPKIQIKNSTFCMTAYPNVTMVNFTSQANKTF--VSGSEEFYKYFVLKI--SAGI  
GlyT1 SNLTNGSR-----PAALPSNLSHLLNHSLQRTSPSEYWRLYVLKL--SDDI  
BetP KGAEGWLG-----KLIDILAIATVF---GTACSLGLGALQI--GAGL

dDAT HDLGAIK----WDMALCLLIVYLICYFS----LWKGISTSGKVWVFTALFP--YAALLIL  
hNET HDIGLPQ----WQLLLCLMVVIVLYFS----LWKGVKTSKGVVWITATLP--YFVLFVL  
LeuT PKGDEPI----LKPSLFAYIVFLITMFINVSILIRGI-SKGIERFAKIAMPTLFILAVFL  
GlyT2 EYPGEIR----WPLALCLFLAWVIVYAS----LAKGIKTSKGVVYFTATFP--YVVLVIL  
GlyT1 GNFGEVR----LPLLGCGLGVSWLVVFLC----LIRGVKSSKGVVYFTATFP--YVVLVIL  
BetP SAANIIEDPDSWTIVGIVSVLTLAFIFS----AISGV-GKGIQYLSNANMV--LAALLAI

dDAT LIRGL-----TLPG----SFLGIQYYLTPNFSAIYKAEV-----WADAATQVFF  
hNET LVHGV-----TLPG----ASNGINAYLHIDFYRLKEATV-----WIDAATQIFF  
LeuT VIRVF-----LLETPNGTAADGLNFWLTPDFEKLKDPGV-----WIAAVGQIFF  
GlyT2 LIRGV-----TLPG----AGAGIWFYITPKWEKLTDATV-----WKDAATQIFF  
GlyT1 FVRGV-----TLEG----AFDGIWYFITPKWEDKILEAKV-----WGDAASQIFY  
BetP FVFVVGPTVSILNLLPG-----SIGNYLSNFFQMAGRTAMSADGTAGEWLGSWTIFYW

```

dDAT      SLGPGFGVLLAYASYNKYHNNVYKDALLTSFINSATSFIAG--FVIFSVLGYMAHTLGVR
hNET      SLGAGFGVLIAFASYNKFDNNCYRDALLTSSINCITSFVSG--FAIFSVILGYMAHEHKVN
LeuT      TLSLGFGAIIITYASYVRKDQDIVLSGLTAATLNEKAEVILGGSISIPAAVAFFGVANAVA
GlyT2     SLSAAWGGLITLSSYNKFHNNCYRDTLIVTCTNSATSIFAG--FVIFSVIGFMANERKVN
GlyT1     SLGCAWGGLITMASYNKFHNNCYRDSVIIISITNCATSIVYAG--FVIFSVILGFMANHLGVD
BetP      AWWISWSPFVGMFLARISRGRSIREFILGVLLVPAGVSTVW--FSIFGGTAIVFEQNGES

dDAT      IEDVATEGPGLVFVVYPAAIATMPASTFWALIFFMMLATLGLDSSFFGGSEAIITALSDEF
hNET      IEDVATEGAGLVFILIPEAISTLSGSTFWAVVFFVMLLALGLDSSMGGMEAVITGLADDF
LeuT      IAKAGAFNLG--FITLPAIFSQTAGGTFLGLFWFFLLFFAGLTSSIAIMQPMIAFLEDEL
GlyT2     IENVADQGGPIAFVVYPEALTRLPLSPFWAIIFFLMLLTLGLDTMFATIETIVTSISDEF
GlyT1     VSRVADHGPGLAFAVAYPEALTLPLISPLWSLLFFFMLILLGLGTQFCLETLVTAIVDEV
BetP      I-----WGDGAAEEQLFGLLHALPGGQIMGIIAMILLGTFFITSA-DSASTVMGTMSQHG

dDAT      --PKIKRNRELFVAGLFSLYFVVGLASCTQGGFYFFHLLDRYAAGYSILVAVFFEAIIVS
hNET      --QVLKRHRKLFTEFGVTFSTFLLALFCITKGGIYVLTLLDTFAAGTSILFAVLMEAIIVS
LeuT      --KLSRKHAVLWTAIVFFSAHLVMFLNKS-----LDEMDFWAGTIGVVFFGLTELIIF
GlyT2     -PKYLRTHKPVFTLGGCCICFFIMGFPMITQGGIYMFQLVDTYAASYALVIAIFELVVIS
GlyT1     GNEWILQKKTIVTLGVAVAGFLLGIPLTSQAGIYWLLLLMDNYAASFSLVVISIMCVAIM
BetP      ----QLEANKWVTAAGVATAAIGLTLTLLSGG-----

dDAT      WIYGTRNFSEDIRD--MIGFPPGRYWQVCWRFVAPIFLLFITVYLLIGYEPLTYADYVYP
hNET      WFIGVDRFSNDIQQ--MMGFRPGLYWRLCWKFVSPAFLLFVVVVSIIINFKPLTYDDYIFP
LeuT      WIFGADKAWEEINRGGIIKVPRIYYYYVM--RYITPAFLAVLLVWAREYIIPKIMEETHWT
GlyT2     YVYGLQRFCEDIEM--MIGFQPNIFWKVCWAFVTPILTILFCFSFYQWEPMTYGSYRYP
GlyT1     YIYGHRYNFQDIQM--MLGFPPPLFFQICWRFVSPAIIFFILVFTVIQYQPITYNHYQYP
BetP      ----DNALSNLQN-----VTIVAATPFLFVVIIGLMFALVKDLSNDVIYL

dDAT      SWANALGWCIAGSSVVMIPAVAIKLLSTPG-SLRQRFTILTTPWRD--QQLVPR-----
hNET      PWANWVGWGIALSSMVLVPIYVIYKFLSTQG-SLWERLAYGITPENE--HHLVAQRDIRQ
LeuT      VW-----ITRFYIIGLFLFLTFLV----FLAERRRNHE-----
GlyT2     NWSMVLGWLMLACSVIWIPIIMFVIKMHLAGP-RFIERLKLVCSPQPDWGPFLAQHRGERY
GlyT1     GWAVAIGFLMALSSVLCIPLYAMFRLCRTDGDITLLQRLKNATKPSRDWGPALLEHRTGRY
BetP      EYREQQRFNARLARERRVHNEHRKRELAAK--RRRERKASGAGKRR-----

dDAT      -----
hNET      FQLQHWLAI-----
LeuT      -----
GlyT2     KNMIDPLGTSSSLGLK-----LPVKDLELGTQC-----
GlyT1     APTIAPSPEDGFVQSLHPDKAQIPIVGSNGSSRLQDSRI
BetP      -----

```

**Fig A.** Multiple sequence alignment of dDAT, hNET, LeuT, GlyT2, GlyT1 and BetP.

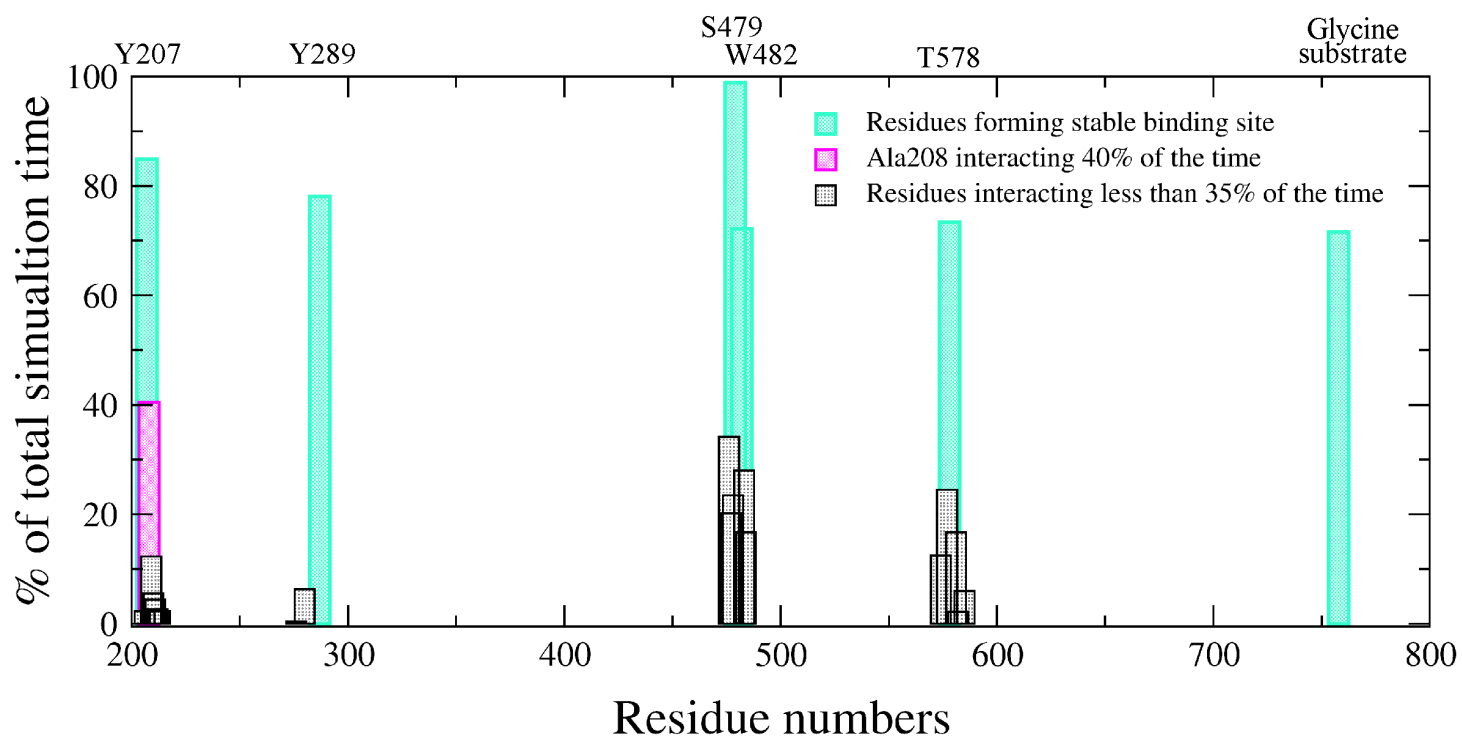

**Fig B.** GlyT2 residues forming direct contacts with the  $\text{Na}^+$  ion residing at the Na1 site, averaged over the 250 ns of simulation time from the five 50 ns MD trajectories. A residue is considered to be forming a direct contact if its CA atom lies within a radius of  $4.0 \text{ \AA}$  of the Na1  $\text{Na}^+$  ion. Note that the substrate glycine is included as the last residue in the protein.

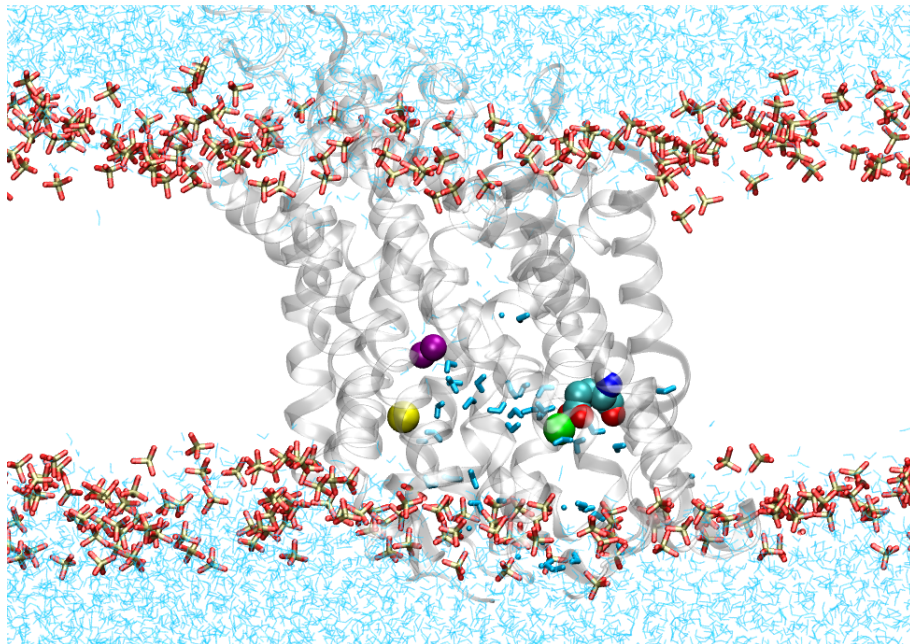

**Fig C.** A solvent-accessible cleft through the GlyT2 homology model allows the diffusion of  $\text{Na}^+$  from its initial position (yellow spacefill) to its final position in MD simulations (green spacefill) corresponding to the location of proposed Na3 site. E648 and the lipid headgroups are shown as CPK licorice. Water molecules are colored cyan and those solvating the protein cleft are in licorice representation. The protein is shown as transparent ribbons.

**Table A.** Distance between the  $\text{Na}^+$  ion occupying the Na1 site of GlyT2 and the binding site, residues averaged over all five 50 ns MD simulations.

| Residues          | Distance (Å)  |
|-------------------|---------------|
| Y207              | $3.5 \pm 0.6$ |
| Y289              | $3.3 \pm 0.6$ |
| S479              | $2.8 \pm 0.3$ |
| W482              | $3.6 \pm 0.5$ |
| T578              | $3.9 \pm 0.5$ |
| Glycine substrate | $3.6 \pm 0.4$ |

**Table B.** Distance between the Na<sup>+</sup> ion occupying the Na2 site of GlyT2 and the binding site, averaged over all five 50 ns MD simulations.

| <b>Residues</b> | <b>Distance (Å)</b> |
|-----------------|---------------------|
| G206            | 2.6 ± 0.4           |
| V209            | 2.5 ± 0.3           |
| L574            | 2.8 ± 0.4           |
| D577            | 2.4 ± 0.3           |

**Table C.** Distance between the glycine substrate and the GlyT2 residues directly implicated in binding, averaged over all five 50 ns MD simulations.

| <b>Residues</b> | <b>Distance (Å)</b> |
|-----------------|---------------------|
| W215            | 3.3 ± 0.6           |
| Y286            | 3.6 ± 0.4           |
| Y287            | 2.6 ± 0.3           |
| G575            | 2.5 ± 0.3           |
| T578            | 2.2 ± 0.4           |

**Table D.** Distance between the Na<sup>+</sup> ion occupying the proposed Na3 binding site and the GlyT2 contacting residues, averaged over the last 35 ns of five MD simulations.

| <b>Residues</b> | <b>Distance (Å)</b> |
|-----------------|---------------------|
| E648            | 2.5 ± 0.3           |
| W263            | 3.2 ± 0.4           |
| M276            | 2.8 ± 0.4           |
| A481            | 2.9 ± 0.3           |
